# Supplementary material
Source: HighWire-hosted journal article supplement (https://jitc.bmj.com/content/8/1/e000396)

**Fig. S1**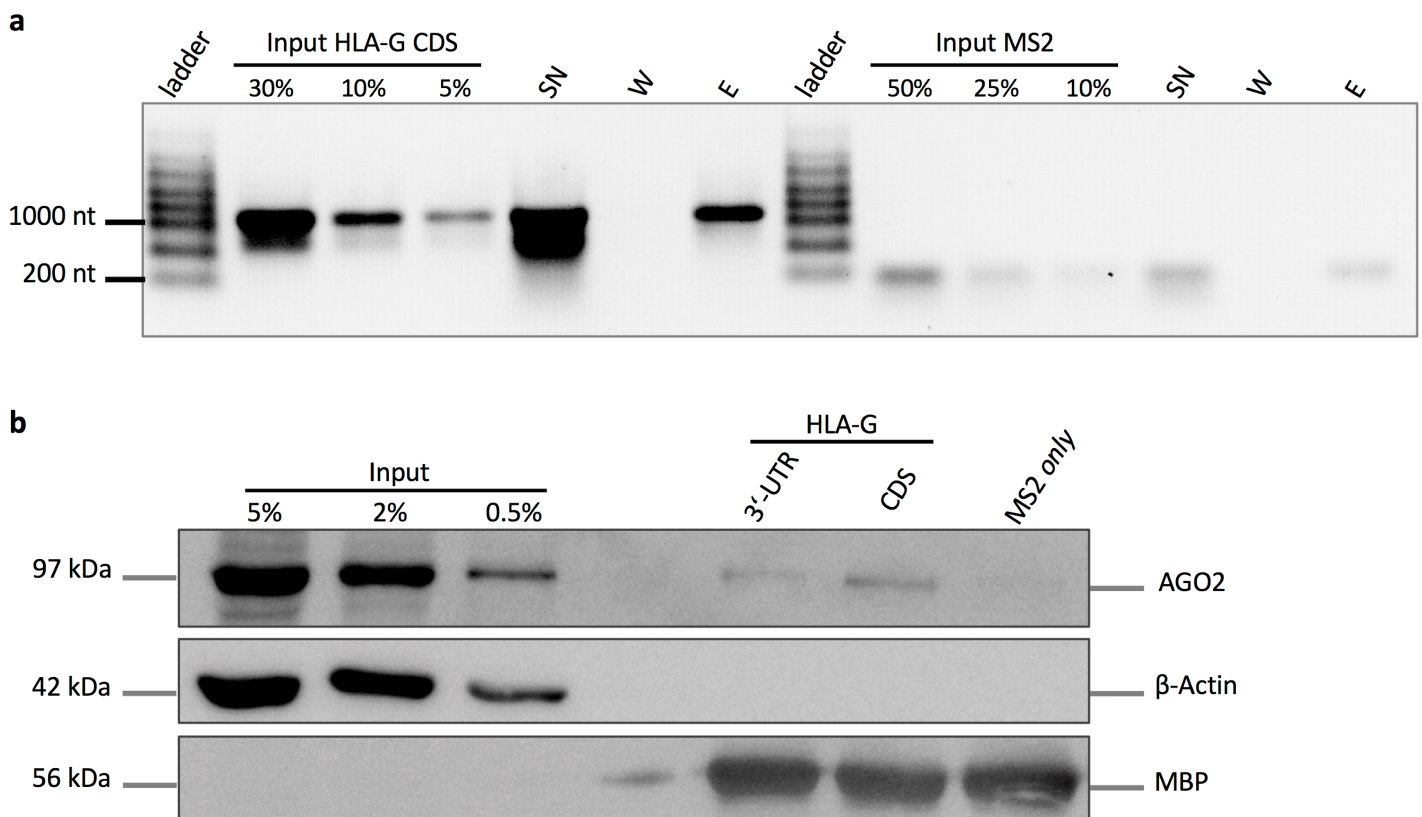

Supplement: inline-supplementary-material-3 [file inline-supplementary-material-3.pdf]

**Fig. S2**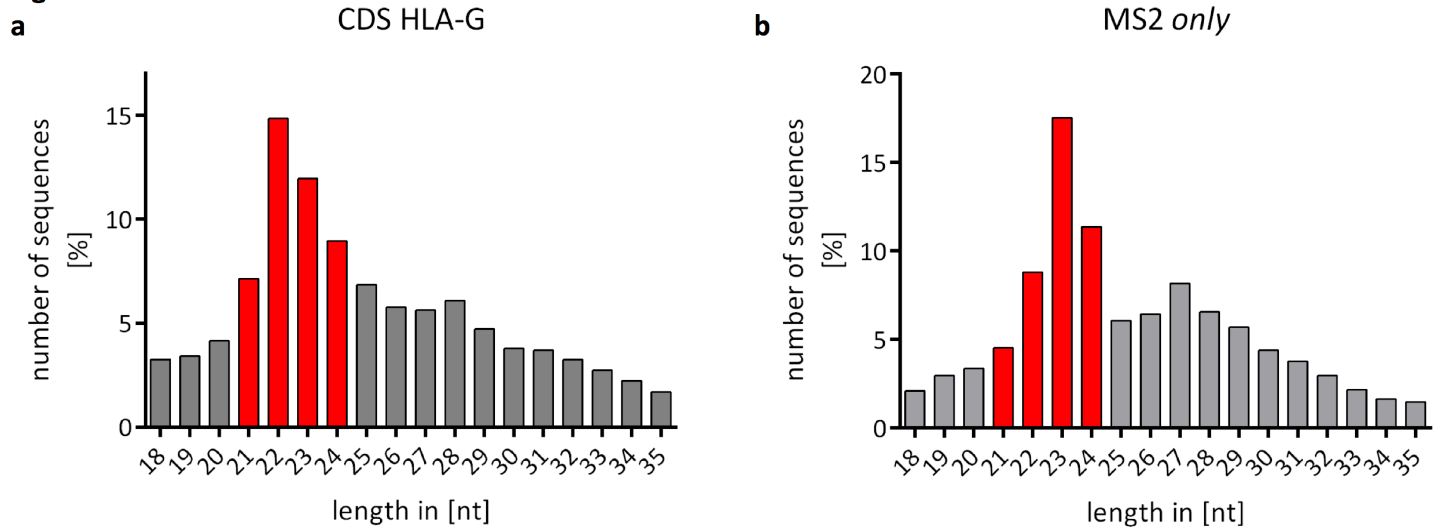

Supplement: inline-supplementary-material-4 [file inline-supplementary-material-4.pdf]

**Fig. S3**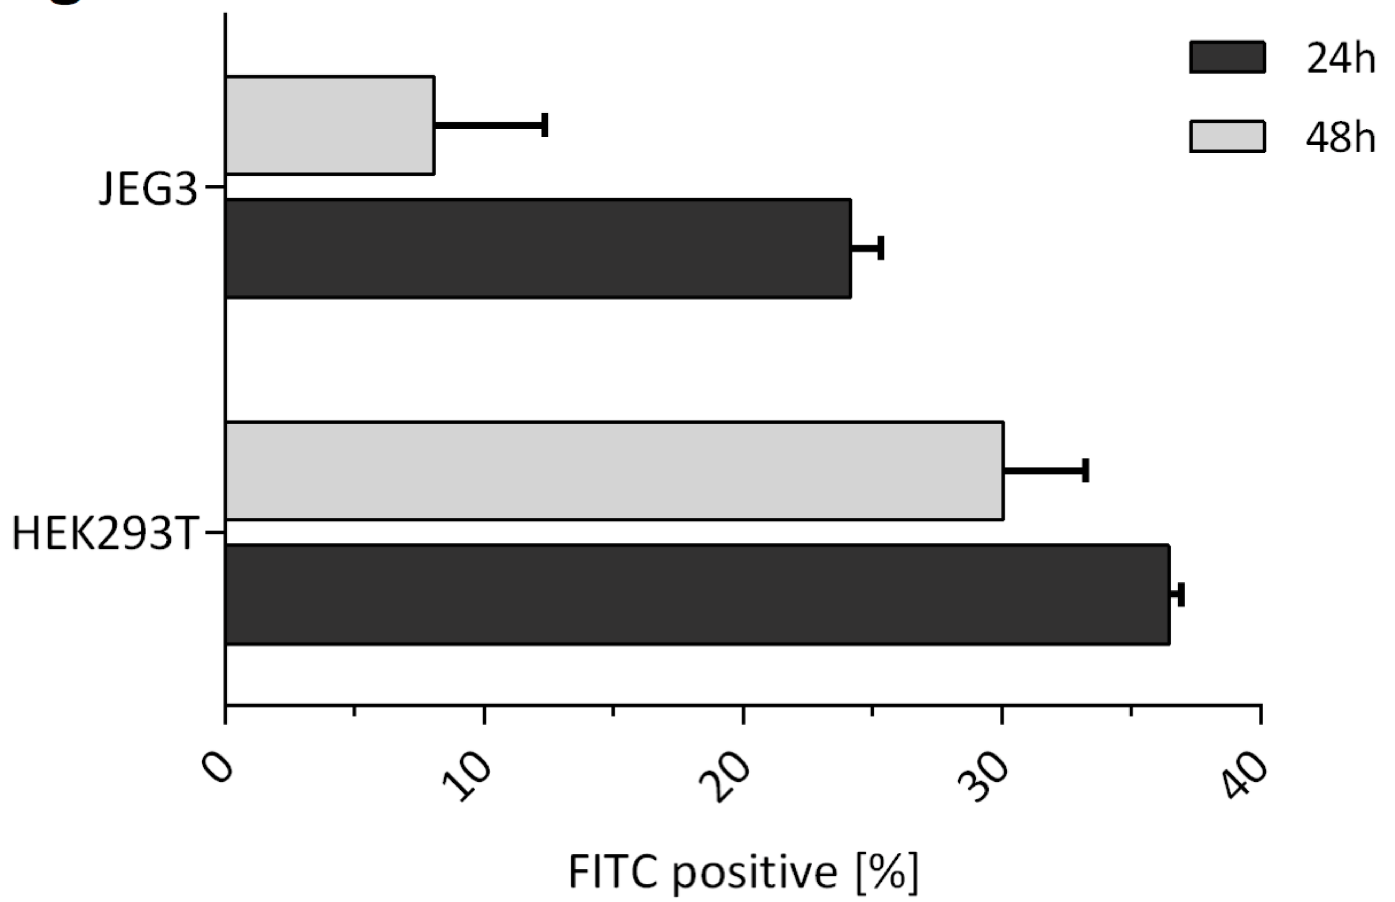

Supplement: inline-supplementary-material-5 [file inline-supplementary-material-5.pdf]

**Fig. S4**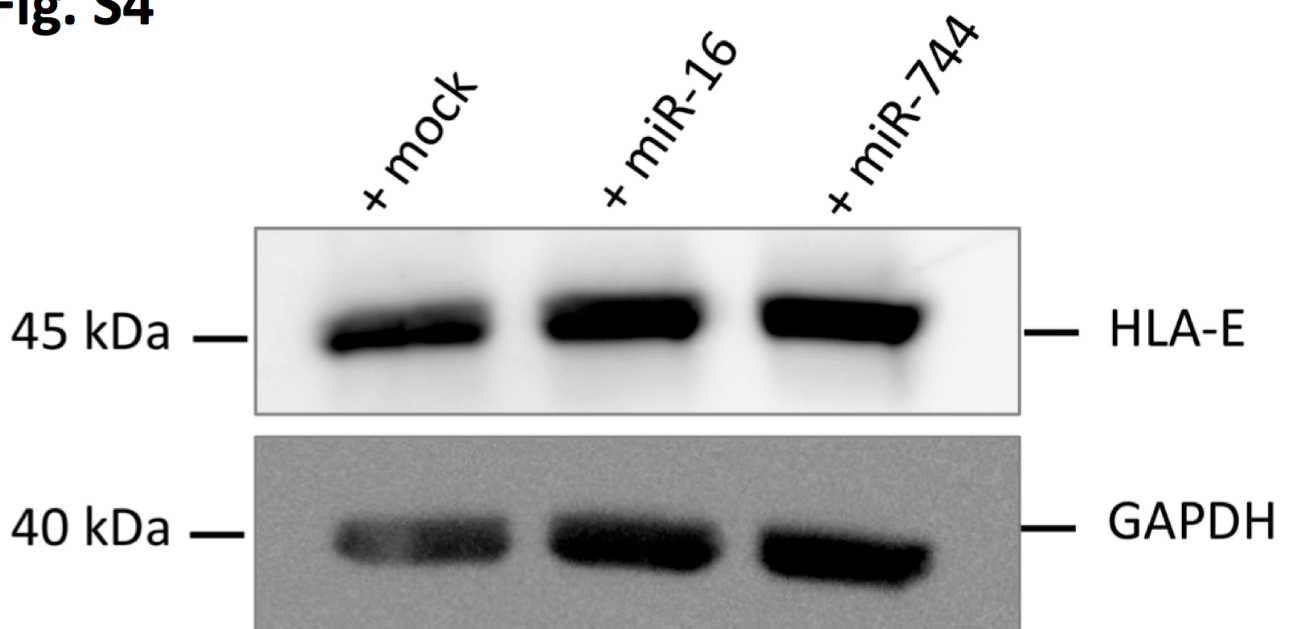

Supplement: inline-supplementary-material-6 [file inline-supplementary-material-6.pdf]

Fig. S5

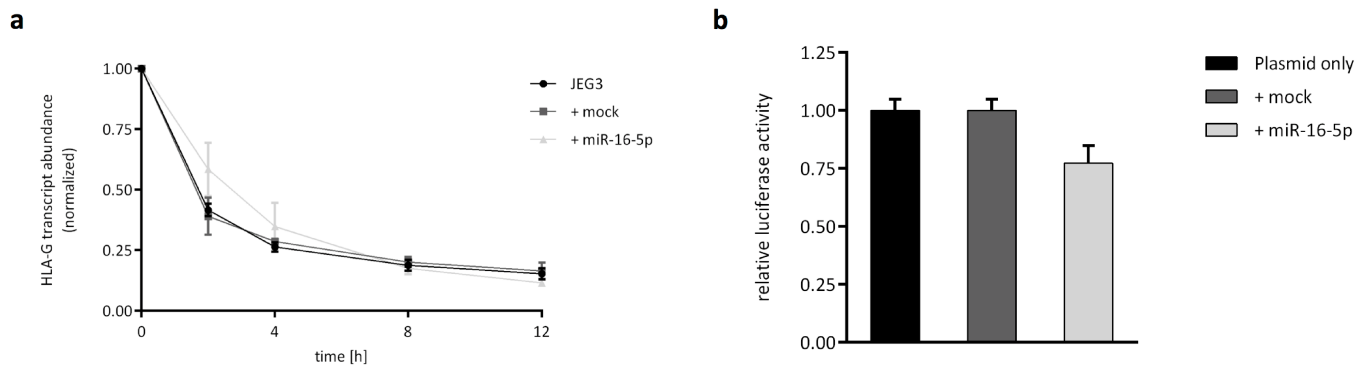

Supplement: inline-supplementary-material-7 [file inline-supplementary-material-7.pdf]
